# Supplementary material for: Skeleton-based cerebrovascular quantitative analysis
Source: BMC Med Imaging. 2016 Dec 20;16:68. doi: 10.1186/s12880-016-0170-8 (PMC5168872; doi:10.1186/s12880-016-0170-8)
Supplement: Additional file 4 — Normal047-skeleton.obj. This file is the skeleton data of the NO.47 data based on the Additional file 2: Normal047-segmentation.obj and cleansed of noise points except the CoW. (OBJ 13.4 kb) [file 12880_2016_170_MOESM4_ESM.obj]

# Studio
g Point_Model_1
v 105.3880155 99.4963497 4.2387964
p 1
v 127.6465952 101.7534882 2.7227500
p 2
v 127.6702881 102.1104530 2.0960120
p 3
v 117.0726046 111.5069687 3.3844272
p 4
v 117.0739755 112.1632829 2.2966489
p 5
v 117.2411591 112.4357879 2.5203340
p 6
v 117.5229922 112.7198711 3.0588019
p 7
v 118.4284836 114.2105609 4.3145600
p 8
v 119.1721484 115.0351390 4.2762249
p 9
v 119.5056364 115.6422868 2.4043480
p 10
v 105.5727676 99.3290022 4.9520331
p 11
v 105.7197601 99.0416035 5.7570860
p 12
v 105.8705077 98.6835361 6.6417288
p 13
v 127.3433417 100.2905816 6.0193869
p 14
v 117.0091704 108.9300737 6.3439170
p 15
v 117.0645431 109.7774878 5.5015604
p 16
v 117.1072572 110.2866679 5.0259763
p 17
v 127.4095029 87.8524184 9.0156170
p 18
v 127.5530010 89.6095335 8.3743269
p 19
v 127.1487921 91.6961730 8.6420588
p 20
v 127.3310333 90.7659233 8.4502436
p 21
v 127.0295531 92.5390944 8.7259961
p 22
v 106.0289517 98.3948261 7.3774564
p 23
v 106.4280197 97.9093015 8.6823711
p 24
v 127.2167563 98.9153981 8.9547504
p 25
v 127.2652447 99.5007232 8.2048401
p 26
v 127.3014545 100.0457332 7.2454079
p 27
v 116.8925613 107.2456911 8.6367168
p 28
v 116.9387698 107.7742353 7.8950161
p 29
v 116.9728562 108.2931086 7.1391072
p 30
v 125.2688318 87.7104029 10.8800288
p 31
v 125.4081130 87.6634419 11.0033974
p 32
v 125.6932765 87.4528661 10.6306104
p 33
v 125.9834021 87.5094160 10.4831345
p 34
v 126.1803508 87.2935876 10.4280980
p 35
v 126.6832203 87.3350203 10.2628823
p 36
v 126.7691702 87.2681439 10.1145376
p 37
v 126.9914210 87.2980207 9.6928729
p 38
v 107.6169387 90.0451243 9.1706133
p 39
v 107.7009961 89.2489627 9.4660036
p 40
v 108.0801114 88.3527622 9.7881220
p 41
v 109.5666587 88.1913826 10.9122479
p 42
v 124.6101782 88.3490741 11.3580534
p 43
v 124.9497384 87.9771709 11.0858716
p 44
v 107.7983305 91.2038237 9.7357295
p 45
v 107.9912558 92.1291262 10.3182662
p 46
v 107.7063903 94.7045013 11.3586178
p 47
v 107.8504547 93.9323455 11.1336792
p 48
v 107.9677865 92.9772183 10.8404905
p 49
v 126.8459111 94.6203172 9.2633376
p 50
v 126.8658340 93.6948955 9.2861513
p 51
v 106.8805680 96.9021618 10.4801394
p 52
v 107.1706936 96.2819681 11.0021178
p 53
v 107.4528620 95.6623852 11.2219900
p 54
v 126.9344836 96.8320146 9.2996871
p 55
v 126.9615591 95.4203159 9.7025931
p 56
v 106.6538543 97.4959955 9.4889253
p 57
v 127.0859689 97.8367552 9.6359719
p 58
v 116.7687997 105.5256128 11.3120200
p 59
v 116.7825833 105.7838127 10.8763827
p 60
v 116.8068722 106.6470072 9.4388304
p 61
v 127.9922575 110.7703596 11.2704253
p 62
v 110.1045832 88.5172859 11.5257725
p 63
v 110.4078665 88.5869116 12.0892385
p 64
v 110.5417237 89.1568586 12.3996567
p 65
v 110.6660143 89.0579820 12.2509524
p 66
v 110.7017100 89.7999257 13.1837428
p 67
v 124.0792572 89.2420858 11.8937390
p 68
v 124.0465343 90.4723331 12.7654336
p 69
v 124.2924929 91.2346095 13.2545736
p 70
v 124.7209609 92.0600817 13.7058496
p 71
v 107.2092354 105.6282148 12.5909513
p 72
v 116.8000847 104.7821194 12.6501359
p 73
v 116.8755591 104.3911502 13.5076586
p 74
v 124.5345548 105.9435457 13.2756112
p 75
v 104.5297906 108.6089388 12.7459466
p 76
v 105.0768048 107.8445017 12.9520455
p 77
v 105.5227593 107.2591990 12.6676681
p 78
v 106.3107625 106.5617502 12.3840803
p 79
v 125.1554638 106.3998491 13.4208659
p 80
v 125.7228553 107.1629003 12.5456369
p 81
v 126.0441691 107.4527502 12.8169544
p 82
v 126.5680641 108.3682925 12.3641016
p 83
v 102.8345227 110.7692197 13.3689754
p 84
v 103.4788266 110.1680174 12.7733219
p 85
v 104.0534899 109.1815829 12.6705542
p 86
v 126.9999892 109.1396660 11.8141212
p 87
v 127.4908334 110.1265326 11.8489163
p 88
v 129.1874796 111.3214418 11.5591437
p 89
v 129.4149905 112.1003330 11.6220405
p 90
v 129.6615750 113.1017506 12.0536080
p 91
v 129.5498013 113.5967374 12.3216836
p 92
v 130.2654445 114.0865088 12.4912225
p 93
v 130.4824948 114.3519282 12.6893185
p 94
v 135.3419870 90.0289938 16.1937065
p 95
v 109.2146412 90.8198059 15.6907700
p 96
v 110.0740358 90.4078856 14.6174198
p 97
v 125.2340227 92.8433612 14.0715707
p 98
v 125.9742081 93.4870914 14.7590348
p 99
v 126.4288574 94.0766633 14.5637132
p 100
v 126.7925352 94.4477841 14.7109563
p 101
v 127.0166934 94.9053466 14.6475192
p 102
v 127.1652281 95.4201892 14.3457074
p 103
v 127.2024661 95.7326144 14.2542487
p 104
v 127.2092313 96.1925834 14.1178109
p 105
v 125.1184344 98.8611057 14.6566406
p 106
v 125.6218702 98.2628241 14.3277533
p 107
v 126.1830777 97.5998938 14.5782111
p 108
v 124.7837320 99.7927114 15.3991757
p 109
v 110.0161746 104.0073782 14.1933616
p 110
v 110.8039245 103.9275527 14.5820444
p 111
v 111.8936837 103.9117575 14.4832702
p 112
v 113.1503582 103.8260758 15.3224608
p 113
v 113.7963757 103.5759225 15.4426191
p 114
v 116.9655696 103.8758680 14.7314584
p 115
v 117.2511652 103.4433544 15.9796774
p 116
v 119.2532107 103.5748869 15.1298782
p 117
v 107.5794548 105.1487699 14.1742146
p 118
v 108.2211807 104.9583703 14.0971467
p 119
v 109.1303900 104.4399366 14.7320582
p 120
v 120.4619482 104.0748805 15.2531406
p 121
v 120.8640635 104.3949723 15.0622055
p 122
v 122.1250892 104.6251059 14.6366656
p 123
v 122.8235438 104.9676836 14.2331822
p 124
v 123.3749539 105.2313745 14.6448528
p 125
v 101.7209589 113.1197438 15.5467633
p 126
v 102.2134945 112.2210249 14.6751851
p 127
v 102.2872627 111.5781218 14.0542220
p 128
v 140.6696737 89.8437724 18.4000917
p 129
v 141.2248015 89.8523256 18.0413537
p 130
v 105.3450033 91.8221846 18.3793046
p 131
v 106.1278582 91.8724462 17.9253351
p 132
v 106.6593155 91.8665752 17.6464412
p 133
v 106.8768427 92.1127945 17.4936689
p 134
v 108.2149744 91.5008783 16.6547801
p 135
v 108.5915118 91.2627876 16.3114015
p 136
v 136.2640262 90.1103690 17.7418254
p 137
v 106.7648456 92.7673355 17.7221298
p 138
v 107.0673317 93.5793072 17.8113002
p 139
v 131.1585754 94.1746533 16.8228298
p 140
v 107.8612432 95.1530561 17.4131021
p 141
v 107.8657284 95.4095945 17.2906648
p 142
v 108.3249003 96.7137367 17.9081708
p 143
v 128.1367987 96.4000598 16.6224539
p 144
v 108.8806540 97.7294371 17.6206101
p 145
v 108.9266613 98.2676372 18.0393904
p 146
v 108.9728028 98.8916010 18.4711423
p 147
v 124.3042126 100.5697697 16.9336218
p 148
v 114.7114709 103.6159620 16.2931290
p 149
v 115.7260388 103.4537479 16.5262520
p 150
v 116.2091792 102.6606038 17.8997181
p 151
v 116.6777089 103.2537743 16.6898407
p 152
v 116.7689860 102.9564440 17.3143093
p 153
v 116.9635281 103.2455862 16.7063605
p 154
v 117.2780246 103.0466855 17.2663722
p 155
v 117.5443158 103.3731028 16.2737798
p 156
v 117.8247631 102.8279811 17.9431401
p 157
v 101.6771197 113.7179434 16.4143257
p 158
v 116.1794960 84.1090009 20.2577896
p 159
v 116.1953360 84.8028585 20.2959254
p 160
v 116.2522957 85.2155685 20.7788739
p 161
v 116.2880808 83.3910108 20.8868328
p 162
v 116.5752336 86.4772275 19.5739195
p 163
v 116.5771857 86.6533890 19.7136048
p 164
v 116.7839989 87.2435272 19.9422929
p 165
v 117.5078154 88.2747918 20.8946448
p 166
v 138.1027102 89.8437724 19.2000959
p 167
v 141.6691244 89.7340924 18.9695638
p 168
v 142.5002217 89.4246548 18.7208224
p 169
v 102.4124920 91.1964402 20.8110977
p 170
v 103.1613424 91.4108679 19.8538974
p 171
v 103.4541205 91.4042071 19.3283055
p 172
v 104.2155474 92.1652094 19.0361999
p 173
v 104.6084985 91.9504240 18.7208876
p 174
v 134.0074688 92.1249390 20.2566814
p 175
v 134.6764416 91.7671993 19.8820736
p 176
v 135.5039477 91.3967565 20.1697871
p 177
v 136.3488883 90.9557343 20.5357485
p 178
v 137.1227056 90.4214829 19.4023624
p 179
v 137.2188330 90.5544236 19.8926162
p 180
v 137.4653280 90.3634429 19.2786641
p 181
v 139.1295046 90.3571621 19.2000959
p 182
v 139.8995817 90.1004747 18.8000947
p 183
v 131.5569431 93.1292102 20.5505602
p 184
v 132.0844740 92.9307342 19.9418794
p 185
v 132.5839758 92.7447006 19.8610183
p 186
v 109.5046774 99.8074785 19.3283278
p 187
v 109.9318042 100.0494584 20.0920478
p 188
v 124.2781654 101.0980010 18.6369140
p 189
v 124.3043020 101.4956757 19.7122991
p 190
v 115.1208952 102.0691693 20.4251539
p 191
v 115.4049411 102.2511199 19.5426904
p 192
v 118.6652109 102.4908572 18.9877022
p 193
v 119.2769855 102.4043933 19.8197216
p 194
v 119.9724898 102.2555009 20.6083599
p 195
v 124.1091266 102.2378281 20.8576098
p 196
v 105.0123051 105.7441831 20.5020923
p 197
v 125.7722974 105.6506559 20.5054600
p 198
v 126.3119578 106.5490097 20.5466282
p 199
v 101.9500196 108.8000238 20.6872635
p 200
v 116.4802089 82.8964412 21.7139628
p 201
v 116.6694686 81.8826184 22.7738302
p 202
v 119.0964356 82.2383761 23.2626479
p 203
v 119.2361861 83.8699564 23.1254604
p 204
v 119.2435548 83.1378251 22.5898884
p 205
v 119.4077507 84.4048038 23.2745688
p 206
v 119.5263416 85.0609913 22.8960887
p 207
v 116.2520871 85.7423022 21.0733283
p 208
v 116.2893921 85.4709074 21.0186150
p 209
v 119.6255982 85.8619064 22.3279074
p 210
v 119.6720973 86.9625062 23.0656788
p 211
v 96.4193270 88.8062865 22.0524780
p 212
v 97.5359902 89.3198177 21.6148179
p 213
v 97.9611054 89.5379931 21.8185168
p 214
v 98.5000655 89.8104534 22.1336726
p 215
v 116.6388020 89.9320915 22.5220006
p 216
v 117.6448986 89.2832950 22.2746618
p 217
v 118.1425899 88.7683332 21.8836982
p 218
v 118.4791327 88.6027813 22.2211741
p 219
v 118.9143136 88.5260552 22.6588808
p 220
v 99.4812697 90.3052613 21.4183647
p 221
v 100.6477773 90.6994268 22.1347492
p 222
v 101.6771048 90.8831507 21.5646401
p 223
v 102.0216495 90.9906104 21.3595647
p 224
v 103.0597240 90.3822333 22.6523206
p 225
v 104.0093899 90.4248878 22.7846578
p 226
v 104.8403531 90.7319933 22.7679890
p 227
v 105.5395529 91.0955146 23.3174171
p 228
v 116.2841767 90.5019939 23.2286546
p 229
v 127.3543090 93.0999592 23.2234523
p 230
v 128.1605214 93.8610509 22.3598164
p 231
v 129.3750256 94.4643095 22.4001128
p 232
v 110.1024747 100.6772444 21.6286313
p 233
v 108.4026769 103.4183204 22.6531029
p 234
v 110.5282158 101.8473804 22.9781959
p 235
v 113.8772815 102.2770628 22.6414204
p 236
v 114.7427708 102.0258591 21.2380141
p 237
v 121.2212294 102.2052765 21.4544442
p 238
v 121.8535155 102.3147404 22.0162943
p 239
v 122.3495007 102.4121568 22.6319563
p 240
v 123.0582744 102.5865227 22.3983061
p 241
v 123.7284318 102.8329730 21.8911488
p 242
v 123.9010170 102.8328910 21.5297844
p 243
v 123.9361688 102.5981084 21.3077012
p 244
v 124.3117079 103.2852679 21.6533840
p 245
v 104.4189334 106.2157154 20.9848601
p 246
v 105.6996584 105.2763611 21.7940584
p 247
v 106.7637652 104.5180187 21.9341014
p 248
v 107.1845144 104.2006090 22.0723711
p 249
v 125.0216067 104.3274403 21.2110486
p 250
v 125.3606230 104.9588174 20.9791493
p 251
v 102.4492532 108.2719117 21.0631620
p 252
v 103.2794788 107.3770374 21.0533068
p 253
v 103.8412228 106.7355126 21.2606937
p 254
v 126.6633123 107.1238890 21.1742632
p 255
v 126.8596053 107.6185331 21.2826896
p 256
v 127.4137646 108.6950824 21.2599188
p 257
v 100.2869457 110.7945219 22.8090771
p 258
v 100.5162820 110.5295494 22.3708507
p 259
v 101.0080352 109.9386588 21.9508428
p 260
v 128.4464598 109.1480777 21.4582030
p 261
v 129.9116910 110.4116142 21.6987673
p 262
v 129.9373657 109.4507724 21.8182914
p 263
v 99.4830653 111.6980389 23.2877005
p 264
v 100.0912338 111.1398637 22.7715317
p 265
v 116.8164015 79.9432546 25.2280738
p 266
v 116.8956533 79.5547888 25.6209187
p 267
v 116.6733056 81.1184868 23.9968169
p 268
v 116.6865453 81.4301074 23.4588217
p 269
v 118.7415645 81.8838254 24.6970505
p 270
v 119.0675870 82.5835466 23.4341491
p 271
v 119.9392155 88.0045146 23.5391520
p 272
v 120.7209229 88.8970271 23.8143280
p 273
v 121.8216792 89.7043496 24.7876178
p 274
v 105.9973985 91.5923715 23.5854685
p 275
v 106.5602750 92.1686292 24.1137501
p 276
v 114.5859435 91.7192772 24.6305130
p 277
v 114.8461625 91.3972333 24.8260051
p 278
v 115.5672893 91.0972878 24.0405221
p 279
v 122.3276183 90.1994854 24.3271478
p 280
v 122.7932647 90.5206949 24.8532873
p 281
v 123.2119575 90.8604860 24.2719017
p 282
v 123.9683479 91.3214236 24.3228003
p 283
v 124.4826168 91.5963352 24.5628860
p 284
v 125.0179261 91.9265822 24.5198682
p 285
v 126.0050237 92.3544690 23.5639568
p 286
v 107.0045605 92.6034153 24.3297555
p 287
v 107.9221070 93.5275108 24.8801578
p 288
v 108.8826507 93.8821062 25.4406873
p 289
v 126.8755645 92.7254111 23.4812610
p 290
v 127.0193607 92.8025171 23.6043595
p 291
v 127.1428168 92.8885341 23.7127617
p 292
v 109.9856645 102.5378406 23.3886521
p 293
v 110.5794162 101.9768789 24.5005433
p 294
v 111.0508293 102.0422652 24.3525598
p 295
v 111.3449931 102.0658389 23.8635559
p 296
v 111.4481241 102.0835489 24.2613126
p 297
v 111.8891612 102.1066830 24.2876913
p 298
v 112.3748496 102.1836624 24.3438166
p 299
v 113.2042781 102.4672613 23.8053743
p 300
v 98.8978148 112.1052653 23.6415844
p 301
v 99.1140902 112.2369245 23.9306372
p 302
v 117.3516437 78.3582404 27.3087788
p 303
v 117.1039417 79.1719928 26.1922739
p 304
v 117.1821579 78.9496005 26.4828168
p 305
v 117.2533184 78.9121464 26.6113970
p 306
v 117.2972620 78.6599591 26.7083328
p 307
v 117.3681915 78.5810500 26.7274398
p 308
v 118.0273145 80.9679255 28.0256402
p 309
v 118.1816906 81.1494291 27.8410707
p 310
v 118.3314845 81.4429447 26.9136671
p 311
v 118.3516756 81.4152807 26.9381143
p 312
v 113.7594953 92.1273604 26.2083504
p 313
v 110.1776734 93.8990638 26.5853945
p 314
v 110.8907089 93.7364176 26.5334994
p 315
v 112.0936275 93.1366831 26.8719476
p 316
v 112.9096746 92.6782787 26.3200160
p 317
v 117.2942519 77.2098303 29.3250009
p 318
v 117.2967330 76.2178302 30.2098170
p 319
v 117.2995269 76.1560872 30.1145148
p 320
v 118.0671602 79.8812136 30.1528256
p 321
v 118.0761233 80.7979479 28.7620053
p 322
v 118.1317791 80.9069425 28.3728205
p 323
v 118.0301160 78.4063339 31.4437971
p 324
v 118.3326617 77.1131366 32.2519839
p 325
v 118.3527410 76.2723535 32.7352285
p 326
v 118.3798090 77.2592351 32.2439000
p 327
v 118.2628572 79.3510824 30.9967641
p 328
# end of file
